# Supplementary material for: Ferrocene/ferrocenium, cobaltocene/cobaltocenium and nickelocene/nickelocenium: from gas phase ionization energy to one-electron reduction potential in solvated medium
Source: Royal Society of Chemistry journal article supplement (doi:10.1039/d3cp01904g), 2023-01-01
Supplement: d3cp01904g1.pdf [file d3cp01904g1.pdf]

## Ferrocene/ferrocenium, cobaltocene/cobaltocenium and nickelocene/nickelocenium: From gas phase ionization energy to one-electron reduction potential in solvated medium

Hongyan Zhao, Yi Pan and Kai-Chung Lau\*

Department of Chemistry, City University of Hong Kong, Tat Chee Avenue, Kowloon, Hong Kong

### Supplementary Information

Gas-phase IE predictions of ferrocene and cobaltocene by the complete basis set extrapolation technique. The individual energy corrections of extrapolated  $\Delta E_{\text{CCSD(T)/CBS}}$  with corrections of  $\Delta E_{\text{CV}}$ ,  $\Delta E_{\text{SR}}$ ,  $\Delta E_{\text{SO}}$ , and  $\Delta E_{\text{ZPVE}}$ , for the IE[ $\text{Cp}_2\text{Fe}({}^1\text{A}_1') \rightarrow \text{Cp}_2\text{Fe}^+({}^2\text{B}_1)$ ] and IE[ $\text{Cp}_2\text{Co}({}^2\text{B}_2) \rightarrow \text{Cp}_2\text{Co}^+({}^1\text{A}_1')$ ] predictions using the CCSD(T)/CBS method are summarized in Table S1. By proceeding from CCSD(T)/cc-pVDZ to CCSD(T)/cc-pVQZ level, the valence electronic contribution at CCSD(T) level to IE( $\text{Cp}_2\text{Fe}$ ) increases from 6.372 (cc-pVDZ) to 6.714 (cc-pVQZ) eV. Augmenting the basis sets with diffuse functions yields 6.531 (aVDZ) and 6.700 (aVTZ) eV, respectively. Extrapolated from the valence electronic energies with the aug-cc-pVTZ and aug-cc-pVQZ basis sets using two-point extrapolation scheme ( $E(X) = E_{\text{extrapolated CBS}} + \frac{B}{X^3}$ ) enables us to obtain effective CCSD(T)/CBS IE( $\text{Cp}_2\text{Fe}$ ) value of 6.788 eV, included with the CV (+0.035 eV), SR (-0.014 eV), SO (-0.017 eV) and ZPVE (+0.013 eV) corrections. Similarly, the CCSD(T)/CBS IE( $\text{Cp}_2\text{Co}$ ) value is 5.290 eV.

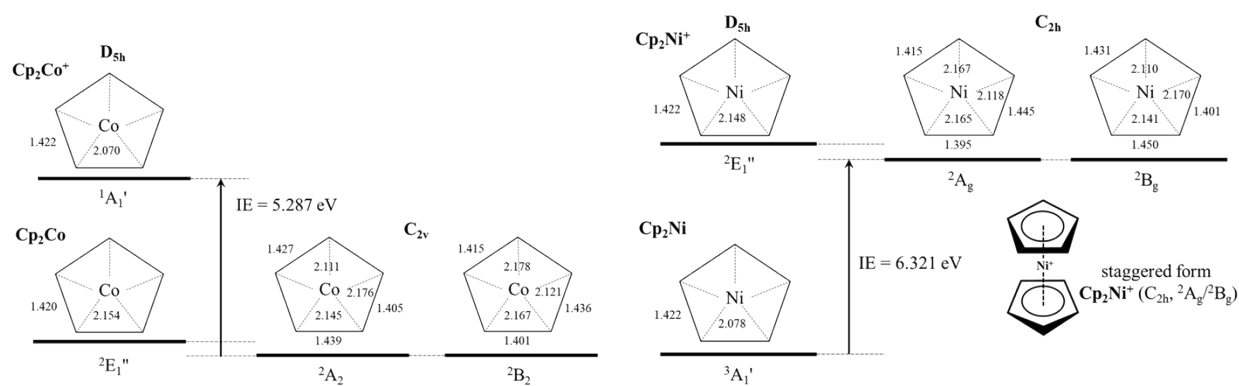

Figure S1. The relative energies of Cp<sub>2</sub>Co( ${}^2\text{E}_1''$ ,  ${}^2\text{A}_2$  and  ${}^2\text{B}_2$  states)/Cp<sub>2</sub>Co<sup>+</sup>( ${}^1\text{A}_1'$ ) and Cp<sub>2</sub>Ni( ${}^3\text{A}_1'$ )/Cp<sub>2</sub>Ni<sup>+</sup>( ${}^2\text{E}_1''$ ,  ${}^2\text{A}_g$  and  ${}^2\text{B}_g$  states) at the CCSD(T)-F12(b)/aug-cc-pVQZ level with the CV, SR, ZPVE and SO corrections. All optimized bond lengths (Å) are at the B3LYP/cc-pVQZ level.

Table S1. Individual energy corrections<sup>a</sup> to the IE(Cp<sub>2</sub>Fe) and IE(Cp<sub>2</sub>Co) predictions using the CCSD(T)/CBS methods (All values in eV).

|                                  |                                 | IE[Cp <sub>2</sub> Fe( <sup>1</sup> A <sub>1</sub> ') → Cp <sub>2</sub> Fe <sup>+</sup> ( <sup>2</sup> B <sub>1</sub> )] <sup>b</sup> | IE[Cp <sub>2</sub> Co( <sup>2</sup> B <sub>2</sub> ) → Cp <sub>2</sub> Co <sup>+</sup> ( <sup>1</sup> A <sub>1</sub> ')] <sup>b</sup> |
|----------------------------------|---------------------------------|---------------------------------------------------------------------------------------------------------------------------------------|---------------------------------------------------------------------------------------------------------------------------------------|
| ΔE <sub>CCSD(T)</sub>            | cc-pVDZ                         | 6.372                                                                                                                                 | 4.991                                                                                                                                 |
|                                  | cc-pVTZ                         | 6.612                                                                                                                                 | 5.150                                                                                                                                 |
|                                  | cc-pVQZ                         | 6.714                                                                                                                                 | 5.194                                                                                                                                 |
|                                  | CBS <sub>DT</sub> <sup>c</sup>  | 6.713                                                                                                                                 | 5.217                                                                                                                                 |
|                                  | CBS <sub>TQ</sub> <sup>c</sup>  | 6.789                                                                                                                                 | 5.225                                                                                                                                 |
|                                  | aVDZ                            | 6.531                                                                                                                                 | 5.115                                                                                                                                 |
|                                  | aVTZ                            | 6.700                                                                                                                                 | 5.194                                                                                                                                 |
|                                  | CBS <sub>aDT</sub> <sup>c</sup> | 6.771                                                                                                                                 | 5.228                                                                                                                                 |
|                                  | ΔE <sub>CV</sub>                |                                                                                                                                       | 0.035                                                                                                                                 |
| ΔE <sub>SR</sub>                 |                                 | -0.014                                                                                                                                | -0.091                                                                                                                                |
| ΔE <sub>SO</sub>                 |                                 | -0.017                                                                                                                                | 0.007                                                                                                                                 |
| ΔE <sub>ZPVE</sub>               |                                 | 0.013                                                                                                                                 | 0.140                                                                                                                                 |
| CCSD(T)/CBS IE <sup>d</sup>      |                                 | 6.788                                                                                                                                 | 5.290                                                                                                                                 |
| CCSD(T)-F12/aVQZ IE <sup>e</sup> |                                 | <b>6.810 (F12a)</b><br><b>6.790 (F12b)</b>                                                                                            | <b>5.295 (F12a)</b><br><b>5.287 (F12b)</b>                                                                                            |
| G4MP2 (this work)                |                                 | 6.74                                                                                                                                  | 5.54                                                                                                                                  |
| Other theoretical value          |                                 | 7.046 <sup>f</sup>                                                                                                                    | 4.77 <sup>n</sup>                                                                                                                     |
|                                  |                                 | 6.810 <sup>g</sup>                                                                                                                    | 5.223 <sup>g</sup>                                                                                                                    |
|                                  |                                 | 6.773 <sup>h</sup>                                                                                                                    | 5.308 <sup>h</sup>                                                                                                                    |
|                                  |                                 | 7.17 <sup>i</sup>                                                                                                                     |                                                                                                                                       |
| Exptl. value                     |                                 | 6.747 ± 0.009 <sup>j</sup>                                                                                                            | 5.3275 ± 0.0006 <sup>o</sup>                                                                                                          |
|                                  |                                 | 6.87 ± 0.07 <sup>k</sup>                                                                                                              | 5.25 ± 0.07 <sup>p</sup>                                                                                                              |
|                                  |                                 | 6.72 ± 0.07 <sup>l</sup>                                                                                                              |                                                                                                                                       |
|                                  |                                 | 6.72 <sup>m</sup>                                                                                                                     |                                                                                                                                       |

<sup>a</sup> See definition of E<sub>CV</sub>, E<sub>SR</sub>, E<sub>SO</sub> and E<sub>ZPVE</sub> from Table 1.

<sup>b</sup> For each pair of isoelectronic species, Cp<sub>2</sub>Fe<sup>+</sup>(<sup>2</sup>A<sub>1</sub> and <sup>2</sup>B<sub>1</sub>), Cp<sub>2</sub>Co(<sup>2</sup>A<sub>2</sub> and <sup>2</sup>B<sub>2</sub>), the ionization process is arbitrarily referred to the species with a “B” symmetry.

<sup>c</sup> Extrapolated from the valence electronic energies with the cc-pV[D-T]Z, cc-pV[T-Q]Z and aug-cc-pV[D-T]Z basis sets using two-point extrapolation scheme, see ref. 40–43 for details.

<sup>d</sup> IE = ΔE<sub>CCSD(T)/CBS(aDT)</sub> + ΔE<sub>CV</sub> + ΔE<sub>SR</sub> + ΔE<sub>SO</sub> + ΔE<sub>ZPVE</sub>.

<sup>e</sup> see main text, IE = ΔE<sub>CCSD(T)-F12/aug-cc-pVQZ</sub> + ΔE<sub>CV</sub> + ΔE<sub>SR</sub> + ΔE<sub>SO</sub> + ΔE<sub>ZPVE</sub>.

<sup>f</sup> From ref. 7. G3(MP2)-RAD(-Full-TZ) value.

<sup>g</sup> From ref. 27. Correlation consistent composite approach (ccCA) values.

<sup>h</sup> From ref. 28. localized coupled cluster method (DLPNO-CCSD(T<sub>0</sub>)) value.

<sup>i</sup> From ref. 29. The 0K IE=7.17 eV is obtained by correcting the 7.11 eV (685.633 kJ/mol, ωB97X-D value at 298 K) with the free energy contribution and temperature effect.

<sup>j</sup> From ref. 8. Obtained by photoionization efficiency measurement.

<sup>k</sup> From ref. 9. The 0K IE=6.87 ± 0.07 eV is obtained by correcting the 6.81 ± 0.07 eV (at 298 K) with the free energy contribution and temperature effect.

<sup>l</sup> From ref. 10. The 0K IE=6.72 ± 0.07 eV is obtained by correcting the 6.64 ± 0.07 eV (at 350 K) with the free energy contribution and temperature effect.

<sup>m</sup> From ref. 32. Obtained by photoelectron spectra.

<sup>n</sup> From ref. 26. PBE value.

<sup>o</sup> From ref. 24. Obtained by mass-analyzed threshold ionization.

<sup>p</sup> From ref. 11. The 0K IE=5.25 ± 0.07 eV is obtained by correcting the 5.36 ± 0.07 eV (at 350 K) with the free energy contribution and temperature effect.

Table S2. Free energies of solvation of Cp<sub>2</sub>Fe/Cp<sub>2</sub>Fe<sup>+</sup>, Cp<sub>2</sub>Co/Cp<sub>2</sub>Co<sup>+</sup> and Cp<sub>2</sub>Ni/Cp<sub>2</sub>Ni<sup>+</sup> in aqueous solution and nonaqueous solvents of acetonitrile, methanol, and acetone.

|                           |              | $\Delta G_{solv}(\text{in eV})^a$ |                                 |                    |                                 |                    |                                 |                    |                                 |
|---------------------------|--------------|-----------------------------------|---------------------------------|--------------------|---------------------------------|--------------------|---------------------------------|--------------------|---------------------------------|
| Model (SMD)               |              | water                             |                                 | acetonitrile       |                                 | methanol           |                                 | Acetone            |                                 |
| Functionals               | Basis set    | Cp <sub>2</sub> Fe                | Cp <sub>2</sub> Fe <sup>+</sup> | Cp <sub>2</sub> Fe | Cp <sub>2</sub> Fe <sup>+</sup> | Cp <sub>2</sub> Fe | Cp <sub>2</sub> Fe <sup>+</sup> | Cp <sub>2</sub> Fe | Cp <sub>2</sub> Fe <sup>+</sup> |
| M05-2X                    | 6-31G(d)     | -0.049                            | -2.212                          | -0.332             | -2.464                          | -0.270             | -2.394                          | -0.331             | -2.417                          |
|                           | 6-31G(d)/SDD | -0.055                            | -2.129                          | -0.337             | -2.385                          | -0.275             | -2.315                          | -0.336             | -2.342                          |
|                           | def2-TZVP    | -0.056                            | -2.166                          | -0.338             | -2.420                          | -0.276             | -2.350                          | -0.337             | -2.376                          |
| Model (PCM)               |              |                                   |                                 |                    |                                 |                    |                                 |                    |                                 |
| M05-2X                    | def2-TZVP    | -0.054                            | -1.849                          | -0.050             | -1.818                          | -0.049             | -1.812                          | -0.044             | -1.775                          |
| Model (uESE) <sup>b</sup> |              |                                   |                                 |                    |                                 |                    |                                 |                    |                                 |
| B3LYP                     | def2-TZVP    | -0.022                            | -2.432                          | -0.340             | -2.842                          | -0.270             | -2.512                          | /                  | /                               |
| Experimental <sup>c</sup> |              | -0.123                            |                                 | -0.332             |                                 | -0.316             |                                 | -0.349             |                                 |
|                           |              |                                   |                                 |                    |                                 |                    |                                 |                    |                                 |
| Model (SMD)               |              | water                             |                                 | acetonitrile       |                                 | methanol           |                                 | acetone            |                                 |
| Functionals               | Basis set    | Cp <sub>2</sub> Co                | Cp <sub>2</sub> Co <sup>+</sup> | Cp <sub>2</sub> Co | Cp <sub>2</sub> Co <sup>+</sup> | Cp <sub>2</sub> Co | Cp <sub>2</sub> Co <sup>+</sup> | Cp <sub>2</sub> Co | Cp <sub>2</sub> Co <sup>+</sup> |
| M05-2X                    | 6-31G(d)     | -0.067                            | -2.106                          | -0.355             | -2.375                          | -0.290             | -2.315                          | -0.354             | -2.216                          |
|                           | 6-31G(d)/SDD | -0.054                            | -2.068                          | -0.343             | -2.333                          | -0.278             | -2.271                          | -0.343             | -2.215                          |
|                           | def2-TZVP    | -0.069                            | -2.092                          | -0.357             | -2.358                          | -0.292             | -2.298                          | -0.355             | -2.229                          |
| Model (PCM)               |              |                                   |                                 |                    |                                 |                    |                                 |                    |                                 |
| M05-2X                    | def2-TZVP    | -0.055                            | -1.853                          | -0.051             | -1.822                          | -0.050             | -1.817                          | -0.046             | -1.780                          |
| Model (uESE) <sup>b</sup> |              |                                   |                                 |                    |                                 |                    |                                 |                    |                                 |
| B3LYP                     | def2-TZVP    | -0.004                            | -2.481                          | -0.324             | -2.808                          | -0.254             | -2.487                          | /                  | /                               |
|                           |              |                                   |                                 |                    |                                 |                    |                                 |                    |                                 |
| Model (SMD)               |              | water                             |                                 | acetonitrile       |                                 | methanol           |                                 | acetone            |                                 |
| Functionals               | Basis set    | Cp <sub>2</sub> Ni                | Cp <sub>2</sub> Ni <sup>+</sup> | Cp <sub>2</sub> Ni | Cp <sub>2</sub> Ni <sup>+</sup> | Cp <sub>2</sub> Ni | Cp <sub>2</sub> Ni <sup>+</sup> | Cp <sub>2</sub> Ni | Cp <sub>2</sub> Ni <sup>+</sup> |
| M05-2X                    | 6-31G(d)     | -0.058                            | -2.100                          | -0.350             | -2.359                          | -0.283             | -2.289                          | -0.349             | -2.319                          |
|                           | 6-31G(d)/SDD | -0.036                            | -2.059                          | -0.328             | -2.319                          | -0.261             | -2.250                          | -0.328             | -2.281                          |
|                           | def2-TZVP    | -0.059                            | -2.092                          | -0.350             | -2.352                          | -0.283             | -2.281                          | -0.349             | -2.310                          |
| Model (PCM)               |              |                                   |                                 |                    |                                 |                    |                                 |                    |                                 |
| M05-2X                    | def2-TZVP    | -0.054                            | -1.842                          | -0.050             | -1.811                          | -0.049             | -1.805                          | -0.045             | -1.769                          |

| Model (uESE) <sup>b</sup> |           |        |        |        |        |        |        |   |   |
|---------------------------|-----------|--------|--------|--------|--------|--------|--------|---|---|
| B3LYP                     | def2-TZVP | -0.011 | -2.362 | -0.317 | -2.765 | -0.259 | -2.448 | / | / |

<sup>a</sup> Calculated from the single point energies difference between at gas-phase and in solvent (eqn. (4)). The free energy change associated with moving from a gas-phase pressure of 1 atm to a liquid-phase concentration of 1 M ( $\Delta G^{1\text{atm} \rightarrow 1\text{M}} = 1.89$  kcal/mol, or 0.082 eV) has already been included in the present data.<sup>90</sup>

<sup>b</sup> The solvation energy calculation of acetone is unavailable in uESE.

<sup>c</sup> From ref. 15.

Table S3. Optimized geometry at B3LYP/cc-pVQZ level.

Cp<sub>2</sub>Fe (<sup>1</sup>A<sub>1</sub>'), D<sub>5h</sub>

|    |             |             |             |
|----|-------------|-------------|-------------|
| Fe | 0.00000000  | 0.00000000  | 0.00000000  |
| C  | 0.00000000  | 1.20989200  | 1.69001500  |
| H  | 0.00000000  | 2.28641000  | 1.67477000  |
| C  | 1.15067500  | 0.37387700  | 1.69001500  |
| H  | 2.17450500  | 0.70653900  | 1.67477000  |
| C  | 0.71115700  | -0.97882300 | 1.69001500  |
| H  | 1.34391800  | -1.84974400 | 1.67477000  |
| C  | -0.71115700 | -0.97882300 | 1.69001500  |
| H  | -1.34391800 | -1.84974400 | 1.67477000  |
| C  | -1.15067500 | 0.37387700  | 1.69001500  |
| H  | -2.17450500 | 0.70653900  | 1.67477000  |
| C  | 0.00000000  | 1.20989200  | -1.69001500 |
| H  | 0.00000000  | 2.28641000  | -1.67477000 |
| C  | 1.15067500  | 0.37387700  | -1.69001500 |
| H  | 2.17450500  | 0.70653900  | -1.67477000 |
| C  | 0.71115700  | -0.97882300 | -1.69001500 |
| H  | 1.34391800  | -1.84974400 | -1.67477000 |
| C  | -0.71115700 | -0.97882300 | -1.69001500 |
| H  | -1.34391800 | -1.84974400 | -1.67477000 |
| C  | -1.15067500 | 0.37387700  | -1.69001500 |
| H  | -2.17450500 | 0.70653900  | -1.67477000 |

Cp<sub>2</sub>Fe<sup>+</sup> (<sup>2</sup>E<sub>2</sub>'), D<sub>5h</sub>

|    |             |             |             |
|----|-------------|-------------|-------------|
| Fe | 0.00000000  | 0.00000000  | 0.00000000  |
| C  | 0.00000000  | 1.20809700  | 1.75349000  |
| C  | -1.14896900 | 0.37332300  | 1.75349000  |
| C  | -0.71010200 | -0.97737100 | 1.75349000  |
| C  | 0.71010200  | -0.97737100 | 1.75349000  |
| C  | 1.14896900  | 0.37332300  | 1.75349000  |
| H  | 0.00000000  | 2.28510300  | 1.74089700  |
| H  | -2.17326200 | 0.70613600  | 1.74089700  |
| H  | -1.34315000 | -1.84868700 | 1.74089700  |
| H  | 1.34315000  | -1.84868700 | 1.74089700  |
| H  | 2.17326200  | 0.70613600  | 1.74089700  |
| C  | 0.00000000  | 1.20809700  | -1.75349000 |
| C  | -1.14896900 | 0.37332300  | -1.75349000 |

|   |             |             |             |
|---|-------------|-------------|-------------|
| C | -0.71010200 | -0.97737100 | -1.75349000 |
| C | 0.71010200  | -0.97737100 | -1.75349000 |
| C | 1.14896900  | 0.37332300  | -1.75349000 |
| H | 0.00000000  | 2.28510300  | -1.74089700 |
| H | -2.17326200 | 0.70613600  | -1.74089700 |
| H | -1.34315000 | -1.84868700 | -1.74089700 |
| H | 1.34315000  | -1.84868700 | -1.74089700 |
| H | 2.17326200  | 0.70613600  | -1.74089700 |

Cp<sub>2</sub>Fe<sup>+</sup> (<sup>2</sup>A<sub>1</sub>), C<sub>2v</sub>

|    |             |             |             |
|----|-------------|-------------|-------------|
| Fe | 0.00000000  | 0.00000000  | 0.00129100  |
| C  | 0.00000000  | 1.80187900  | -1.20477200 |
| C  | -1.14747500 | 1.76603500  | -0.37543900 |
| C  | -0.71292600 | 1.71087200  | 0.97773900  |
| C  | 0.71292600  | 1.71087200  | 0.97773900  |
| C  | 1.14747500  | 1.76603500  | -0.37543900 |
| H  | 0.00000000  | 1.81376900  | -2.28214400 |
| H  | -2.17027300 | 1.76148100  | -0.71333000 |
| H  | -1.34844400 | 1.68342100  | 1.84652900  |
| H  | 1.34844400  | 1.68342100  | 1.84652900  |
| H  | 2.17027300  | 1.76148100  | -0.71333000 |
| C  | 0.00000000  | -1.80187900 | -1.20477200 |
| C  | -1.14747500 | -1.76603500 | -0.37543900 |
| C  | -0.71292600 | -1.71087200 | 0.97773900  |
| C  | 0.71292600  | -1.71087200 | 0.97773900  |
| C  | 1.14747500  | -1.76603500 | -0.37543900 |
| H  | 0.00000000  | -1.81376900 | -2.28214400 |
| H  | -2.17027300 | -1.76148100 | -0.71333000 |
| H  | -1.34844400 | -1.68342100 | 1.84652900  |
| H  | 1.34844400  | -1.68342100 | 1.84652900  |
| H  | 2.17027300  | -1.76148100 | -0.71333000 |

Cp<sub>2</sub>Fe<sup>+</sup> (<sup>2</sup>B<sub>1</sub>), C<sub>2v</sub>

|    |             |             |             |
|----|-------------|-------------|-------------|
| Fe | 0.00000000  | 0.00000000  | 0.00118800  |
| C  | 0.00000000  | 1.70172900  | 1.21038100  |
| C  | 1.15077900  | 1.73505100  | 0.37082400  |
| C  | 0.70759600  | 1.79192900  | -0.97601400 |
| C  | -0.70759600 | 1.79192900  | -0.97601400 |
| C  | -1.15077900 | 1.73505100  | 0.37082400  |
| H  | 0.00000000  | 1.67071700  | 2.28664500  |
| H  | 2.17654200  | 1.71731400  | 0.69841400  |
| H  | 1.33827000  | 1.79921000  | -1.84946300 |
| H  | -1.33827000 | 1.79921000  | -1.84946300 |
| H  | -2.17654200 | 1.71731400  | 0.69841400  |
| C  | 0.00000000  | -1.70172900 | 1.21038100  |
| C  | 1.15077900  | -1.73505100 | 0.37082400  |
| C  | 0.70759600  | -1.79192900 | -0.97601400 |
| C  | -0.70759600 | -1.79192900 | -0.97601400 |
| C  | -1.15077900 | -1.73505100 | 0.37082400  |
| H  | 0.00000000  | -1.67071700 | 2.28664500  |
| H  | 2.17654200  | -1.71731400 | 0.69841400  |

|   |             |             |             |
|---|-------------|-------------|-------------|
| H | 1.33827000  | -1.79921000 | -1.84946300 |
| H | -1.33827000 | -1.79921000 | -1.84946300 |
| H | -2.17654200 | -1.71731400 | 0.69841400  |

Cp<sub>2</sub>Co(<sup>2</sup>E<sub>1</sub>"), D<sub>5h</sub>

|    |             |             |             |
|----|-------------|-------------|-------------|
| Co | 0.00000000  | 0.00000000  | 0.00000000  |
| C  | 0.00000000  | 1.20779000  | 1.78368900  |
| C  | -1.14867600 | 0.37322800  | 1.78368900  |
| C  | -0.70992100 | -0.97712200 | 1.78368900  |
| C  | 0.70992100  | -0.97712200 | 1.78368900  |
| C  | 1.14867600  | 0.37322800  | 1.78368900  |
| H  | 0.00000000  | 2.28444000  | 1.77374600  |
| H  | -2.17263100 | 0.70593100  | 1.77374600  |
| H  | -1.34276000 | -1.84815100 | 1.77374600  |
| H  | 1.34276000  | -1.84815100 | 1.77374600  |
| H  | 2.17263100  | 0.70593100  | 1.77374600  |
| C  | 0.00000000  | 1.20779000  | -1.78368900 |
| C  | -1.14867600 | 0.37322800  | -1.78368900 |
| C  | -0.70992100 | -0.97712200 | -1.78368900 |
| C  | 0.70992100  | -0.97712200 | -1.78368900 |
| C  | 1.14867600  | 0.37322800  | -1.78368900 |
| H  | 0.00000000  | 2.28444000  | -1.77374600 |
| H  | -2.17263100 | 0.70593100  | -1.77374600 |
| H  | -1.34276000 | -1.84815100 | -1.77374600 |
| H  | 1.34276000  | -1.84815100 | -1.77374600 |
| H  | 2.17263100  | 0.70593100  | -1.77374600 |

Cp<sub>2</sub>Co(<sup>2</sup>A<sub>2</sub>), C<sub>2v</sub>

|    |             |             |             |
|----|-------------|-------------|-------------|
| Co | 0.00000000  | 0.00000000  | 0.00243600  |
| C  | 0.00000000  | 1.74159400  | 1.19587300  |
| C  | 1.15974300  | 1.80533800  | 0.36674400  |
| C  | 0.71958300  | 1.77315100  | -0.96691200 |
| C  | -0.71958300 | 1.77315100  | -0.96691200 |
| C  | -1.15974300 | 1.80533800  | 0.36674400  |
| H  | 0.00000000  | 1.72415300  | 2.27310800  |
| H  | 2.18155100  | 1.79760000  | 0.70452900  |
| H  | 1.34421900  | 1.76288100  | -1.84413800 |
| H  | -1.34421900 | 1.76288100  | -1.84413800 |
| H  | -2.18155100 | 1.79760000  | 0.70452900  |
| C  | 0.00000000  | -1.74159400 | 1.19587300  |
| C  | 1.15974300  | -1.80533800 | 0.36674400  |
| C  | 0.71958300  | -1.77315100 | -0.96691200 |
| C  | -0.71958300 | -1.77315100 | -0.96691200 |
| C  | -1.15974300 | -1.80533800 | 0.36674400  |
| H  | 0.00000000  | -1.72415300 | 2.27310800  |
| H  | 2.18155100  | -1.79760000 | 0.70452900  |
| H  | 1.34421900  | -1.76288100 | -1.84413800 |
| H  | -1.34421900 | -1.76288100 | -1.84413800 |
| H  | -2.18155100 | -1.79760000 | 0.70452900  |

Cp<sub>2</sub>Co(<sup>2</sup>B<sub>2</sub>), C<sub>2v</sub>

|    |             |             |             |
|----|-------------|-------------|-------------|
| Co | 0.00000000  | 0.00000000  | 0.00658300  |
| C  | 0.00000000  | 1.81072900  | 1.21611500  |
| C  | 1.13754100  | 1.75179700  | 0.37648600  |
| C  | 0.70032200  | 1.79207400  | -0.99078900 |
| C  | -0.70032200 | 1.79207400  | -0.99078900 |
| C  | -1.13754100 | 1.75179700  | 0.37648600  |
| H  | 0.00000000  | 1.80445900  | 2.29218400  |
| H  | 2.16400100  | 1.73754400  | 0.70305800  |
| H  | 1.34070100  | 1.78272700  | -1.85611100 |
| H  | -1.34070100 | 1.78272700  | -1.85611100 |
| H  | -2.16400100 | 1.73754400  | 0.70305800  |
| C  | 0.00000000  | -1.81072900 | 1.21611500  |
| C  | 1.13754100  | -1.75179700 | 0.37648600  |
| C  | 0.70032200  | -1.79207400 | -0.99078900 |
| C  | -0.70032200 | -1.79207400 | -0.99078900 |
| C  | -1.13754100 | -1.75179700 | 0.37648600  |
| H  | 0.00000000  | -1.80445900 | 2.29218400  |
| H  | 2.16400100  | -1.73754400 | 0.70305800  |
| H  | 1.34070100  | -1.78272700 | -1.85611100 |
| H  | -1.34070100 | -1.78272700 | -1.85611100 |
| H  | -2.16400100 | -1.73754400 | 0.70305800  |

Cp<sub>2</sub>Co<sup>+</sup> (<sup>1</sup>A<sub>1</sub>'), D<sub>5h</sub>

|    |             |             |             |
|----|-------------|-------------|-------------|
| Co | 0.00000000  | 0.00000000  | 0.00000000  |
| C  | 0.00000000  | 1.20969200  | 1.67931000  |
| H  | 0.00000000  | 2.28620400  | 1.65869000  |
| C  | 1.15048600  | 0.37381600  | 1.67931000  |
| H  | 2.17430900  | 0.70647600  | 1.65869000  |
| C  | 0.71103900  | -0.97866200 | 1.67931000  |
| H  | 1.34379700  | -1.84957800 | 1.65869000  |
| C  | -0.71103900 | -0.97866200 | 1.67931000  |
| H  | -1.34379700 | -1.84957800 | 1.65869000  |
| C  | -1.15048600 | 0.37381600  | 1.67931000  |
| H  | -2.17430900 | 0.70647600  | 1.65869000  |
| C  | 0.00000000  | 1.20969200  | -1.67931000 |
| H  | 0.00000000  | 2.28620400  | -1.65869000 |
| C  | 1.15048600  | 0.37381600  | -1.67931000 |
| H  | 2.17430900  | 0.70647600  | -1.65869000 |
| C  | 0.71103900  | -0.97866200 | -1.67931000 |
| H  | 1.34379700  | -1.84957800 | -1.65869000 |
| C  | -0.71103900 | -0.97866200 | -1.67931000 |
| H  | -1.34379700 | -1.84957800 | -1.65869000 |
| C  | -1.15048600 | 0.37381600  | -1.67931000 |
| H  | -2.17430900 | 0.70647600  | -1.65869000 |

Cp<sub>2</sub>Ni (<sup>3</sup>A<sub>1</sub>'), D<sub>5h</sub>

|    |             |             |             |
|----|-------------|-------------|-------------|
| Ni | -0.00005600 | 0.00007900  | 0.00047000  |
| C  | 1.87756400  | -1.18767400 | -0.21532300 |
| C  | 1.87685600  | -0.16373700 | -1.19699500 |
| C  | 1.87701100  | 1.08635400  | -0.52661000 |
| C  | 1.87798000  | 0.83506700  | 0.86950400  |

|   |             |             |             |
|---|-------------|-------------|-------------|
| C | 1.87830900  | -0.57036300 | 1.06183400  |
| H | 1.87346200  | -2.24756900 | -0.40605200 |
| H | 1.87211900  | -0.30978000 | -2.26395800 |
| H | 1.87251200  | 2.05595600  | -0.99522700 |
| H | 1.87442000  | 1.58036900  | 1.64684400  |
| H | 1.87493000  | -1.07938400 | 2.01086200  |
| C | -1.87797200 | -1.18726000 | -0.21445300 |
| C | -1.87824200 | -0.16180900 | -1.19461200 |
| C | -1.87747000 | 1.08725300  | -0.52231100 |
| C | -1.87672800 | 0.83379500  | 0.87342000  |
| C | -1.87709900 | -0.57192300 | 1.06365700  |
| H | -1.87417300 | -2.24685900 | -0.40682500 |
| H | -1.87481500 | -0.30623700 | -2.26180100 |
| H | -1.87336300 | 2.05757100  | -0.98944500 |
| H | -1.87208800 | 1.57791700  | 1.65188600  |
| H | -1.87269300 | -1.08240100 | 2.01189800  |

$\text{Cp}_2\text{Ni}^+$  ( ${}^2E_1$ ),  $D_{5h}$

|    |             |             |             |
|----|-------------|-------------|-------------|
| Ni | 0.00000000  | 0.00000000  | 0.00000000  |
| C  | 0.00000000  | 1.20974700  | 1.77452300  |
| C  | -1.15053800 | 0.37383200  | 1.77452300  |
| C  | -0.71107100 | -0.97870600 | 1.77452300  |
| C  | 0.71107100  | -0.97870600 | 1.77452300  |
| C  | 1.15053800  | 0.37383200  | 1.77452300  |
| H  | 0.00000000  | 2.28660500  | 1.76976100  |
| H  | -2.17469000 | 0.70660000  | 1.76976100  |
| H  | -1.34403300 | -1.84990200 | 1.76976100  |
| H  | 1.34403300  | -1.84990200 | 1.76976100  |
| H  | 2.17469000  | 0.70660000  | 1.76976100  |
| C  | 0.00000000  | 1.20974700  | -1.77452300 |
| C  | -1.15053800 | 0.37383200  | -1.77452300 |
| C  | -0.71107100 | -0.97870600 | -1.77452300 |
| C  | 0.71107100  | -0.97870600 | -1.77452300 |
| C  | 1.15053800  | 0.37383200  | -1.77452300 |
| H  | 0.00000000  | 2.28660500  | -1.76976100 |
| H  | -2.17469000 | 0.70660000  | -1.76976100 |
| H  | -1.34403300 | -1.84990200 | -1.76976100 |
| H  | 1.34403300  | -1.84990200 | -1.76976100 |
| H  | 2.17469000  | 0.70660000  | -1.76976100 |

$\text{Cp}_2\text{Ni}^+$  ( ${}^2A_g$ ),  $C_{2h}$

|    |             |            |             |
|----|-------------|------------|-------------|
| Ni | 0.00000000  | 0.00000000 | 0.00000000  |
| C  | 0.00000000  | 1.78600600 | 1.13824300  |
| C  | 0.80960100  | 2.00956100 | 0.00000000  |
| C  | 0.00000000  | 1.78600600 | -1.13824300 |
| C  | -1.35392600 | 1.53847700 | -0.69752500 |
| C  | -1.35392600 | 1.53847700 | 0.69752500  |
| H  | 0.32123800  | 1.84073000 | 2.16524200  |
| H  | 1.86320400  | 2.22938600 | 0.00000000  |
| H  | 0.32123800  | 1.84073000 | -2.16524200 |



|   |             |             |             |
|---|-------------|-------------|-------------|
| H | -2.19833700 | 1.35696000  | -1.34047000 |
| H | -2.19833700 | 1.35696000  | 1.34047000  |
| C | 0.00000000  | -1.78600600 | 1.13824300  |
| C | 1.35392600  | -1.53847700 | 0.69752500  |
| C | 1.35392600  | -1.53847700 | -0.69752500 |
| C | 0.00000000  | -1.78600600 | -1.13824300 |
| C | -0.80960100 | -2.00956100 | 0.00000000  |
| H | -0.32123800 | -1.84073000 | 2.16524200  |
| H | 2.19833700  | -1.35696000 | 1.34047000  |
| H | 2.19833700  | -1.35696000 | -1.34047000 |
| H | -0.32123800 | -1.84073000 | -2.16524200 |
| H | -1.86320400 | -2.22938600 | 0.00000000  |

Cp<sub>2</sub>Ni<sup>+</sup> (<sup>2</sup>B<sub>g</sub>), C<sub>2h</sub>

|    |             |             |             |
|----|-------------|-------------|-------------|
| Ni | 0.00000000  | 0.00000000  | 0.00000000  |
| C  | 0.82746300  | 1.94096100  | 0.00000000  |
| H  | 1.88710600  | 2.13686800  | 0.00000000  |
| C  | 0.00000000  | 1.83165600  | 1.16286600  |
| H  | 0.33376300  | 1.89618800  | 2.18419000  |
| C  | -1.29829800 | 1.54042300  | 0.72518300  |
| H  | -2.15843200 | 1.36083100  | 1.34817400  |
| C  | -1.29829800 | 1.54042300  | -0.72518300 |
| H  | -2.15843200 | 1.36083100  | -1.34817400 |
| C  | 0.00000000  | 1.83165600  | -1.16286600 |
| H  | 0.33376300  | 1.89618800  | -2.18419000 |
| C  | -0.82746300 | -1.94096100 | 0.00000000  |
| H  | -1.88710600 | -2.13686800 | 0.00000000  |
| C  | 0.00000000  | -1.83165600 | -1.16286600 |
| H  | -0.33376300 | -1.89618800 | -2.18419000 |
| C  | 1.29829800  | -1.54042300 | -0.72518300 |
| H  | 2.15843200  | -1.36083100 | -1.34817400 |
| C  | 1.29829800  | -1.54042300 | 0.72518300  |
| H  | 2.15843200  | -1.36083100 | 1.34817400  |
| C  | 0.00000000  | -1.83165600 | 1.16286600  |
| H  | -0.33376300 | -1.89618800 | 2.18419000  |
